# Supplementary material for: Adverse Life Trajectories Are a Risk Factor for SARS-CoV-2 IgA Seropositivity
Source: MDPI journal article supplement (doi:10.3390/jcm10102159), 2021-05-17
Supplement: s1 [file s1]

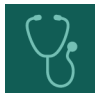

Article

# Adverse life trajectories are a risk factor for SARS-CoV-2 IgA seropositivity

Cyrielle Holuka<sup>1,2</sup>, Chantal J. Snoeck<sup>3</sup>, Sophie B. Mériaux<sup>1</sup>, Markus Ollert<sup>4,5</sup>, Rejko Kruger<sup>6,7</sup>, and Jonathan D. Turner<sup>1,\*</sup> on behalf of the CON-VINCE Study Group \*

<sup>1</sup> Immune Endocrine Epigenetics Research Group, Department of Infection and Immunity, Luxembourg Institute of Health, Esch-sur-Alzette, Luxembourg

<sup>2</sup> Faculty of Science, University of Luxembourg, Belval, Luxembourg

<sup>3</sup> Clinical and Applied Virology Group, Department of Infection and Immunity, Luxembourg Institute of Health, Esch-sur-Alzette, Luxembourg

<sup>4</sup> Allergy and Clinical Immunology, Department of Infection and Immunity, Luxembourg Institute of Health, 29, rue Henri Koch, L-4354 Esch-sur-Alzette, Luxembourg

<sup>5</sup> Department of Dermatology and Allergy Center, Odense Research Center for Anaphylaxis, University of Southern Denmark, Odense C, Denmark

<sup>6</sup> Transversal Translational Medicine, Luxembourg Institute of Health (LIH), Strassen, Luxembourg.

<sup>7</sup> LCSB, Luxembourg Centre for Systems Biomedicine, University of Luxembourg, Esch-Sur-Alzette, Luxembourg

\* Correspondence: jonathan.turner@lih.lu Tel.: +352 2697 0629

## Supplementary material

### Contents:

|                       |    |
|-----------------------|----|
| Supplementary Table 1 | p2 |
| Supplementary Table 2 | p3 |
| Supplementary Table 3 | p4 |
| Supplementary Table 4 | p6 |

Supplementary table 1

| How did the following life events affect you :                 | Cluster          |                  |                  | p-value |
|----------------------------------------------------------------|------------------|------------------|------------------|---------|
|                                                                | 1                | 2                | 3                |         |
| Q1 Separation from a partner:                                  | -1.22<br>± 1.97) | -2.00 ±<br>1.71  | 0.599 ±<br>1.21  | <2e-16  |
| Q2 Separation of your parents:                                 | -1.64 ±<br>1.84  | -2.31 ±<br>1.47  | 0.636 ±<br>1.14  | <2e-16  |
| Q3 Your parents starting new relationships:                    | -2.42 ±<br>1.34  | -2.72 ±<br>0.972 | 0.444 ±<br>1.32  | <2e-16  |
| Q4 Money worries: Major life events shape your overall health. | -0.568 ±<br>1.75 | -2.57 ±<br>1.15  | 0.704 ±<br>0.798 | <2e-16  |
| Q5 Money worries for other family members:                     | -0.726 ±<br>1.81 | -2.66 ±<br>1.05  | 0.688 ±<br>0.712 | <2e-16  |
| Q6 Accident / illness:                                         | 0.0912 ±<br>1.45 | -2.54 ±<br>1.16  | 0.736 ±<br>0.811 | <2e-16  |
| Q7 Accident / illness of a family members                      | 0.430 ±<br>1.24  | -1.97 ±<br>1.68  | 0.710 ±<br>0.862 | <2e-16  |
| Q8 Losing your job:                                            | -2.52 ±<br>1.25  | -2.84 ±<br>0.731 | 0.723<br>± 1.00  | <2e-16  |
| Q9 Job loss of a close family member:                          | -2.21 ±<br>1.50  | -2.80 ±<br>0.801 | 0.789 ±<br>0.826 | <2e-16  |
| Q10 Being a victim of violence:                                | -2.67 ±<br>1.04  | -2.86 ±<br>0.709 | 0.717 ±<br>1.16  | <2e-16  |
| Q11 A family member being a victim violence:                   | -2.69 ±<br>1.03  | -2.84 ±<br>0.726 | 0.697 ±<br>1.16  | <2e-16  |
| Q12 Death of a family member:                                  | 0.441 ±<br>1.48  | -1.48 ±<br>1.91  | 0.845 ±<br>1.07  | <2e-16  |

**Supplementary table 1: mean responses to the individual questions for the three clusters.**

Answers to individual question for each cluster are represented in the table.

Supplementary Table 2

|          | number | Female/male (Chi2) | IgA positive | RR (95%CI; p-value)          |
|----------|--------|--------------------|--------------|------------------------------|
| CTQ>2    | 18     | 17/1               | 6 (33%)      | 6.51<br>(0.78- 49.27; 0.060) |
| CTQ+ATE1 | 7      | 6/1 (0.0027)       | 1 (14%)      | 1.07<br>(0.06 - 6.33; 0.948) |
| CTQ+ATE2 | 1      | 1/0 (0.392)        | 1 (100%)     | 7.53<br>(6.60 - 8.59; 0.133) |
| CTQ+ATE3 | 10     | 4/6 (1.38e-06)     | 4 (40%)      | 3.00<br>(1.39 - 6.48; 0.035) |

**Supplementary table 2: risk of IgA seropositivity when ELA and ATE are both present.** For each cluster, ratio female/male and statistics of IgA positivity are given in the table.

Supplementary Table 3

| Comorbidities     | CES                            | GAD                            | UCLA                           | PSS                             | BRS                          |
|-------------------|--------------------------------|--------------------------------|--------------------------------|---------------------------------|------------------------------|
| Mild liver        | F(1, 1439) = 1,846, p= 0,174   | F(1, 1439)= 0,164, p= 0,685    | F(1, 1439)= 1,151, p= 0,698    | F(1, 1439)= 0,062, p= 0,803     | F(1, 1439)= 1,417, p= 0,739  |
| Hypertension      | F(1, 1454)= 6,452, p= 0,0112   | F(1, 1454)= 4,244, p= 0,0396   | F(1, 1454)= 4,561, p= 0,0329   | F(1, 1454)= 2,89, p= 0,0894     | F(1, 1454)= 1,211, p= 0,271  |
| Chronic kidney    | F(1, 1461)= 0,142, p= 0,707    | F(1, 1476)= 0,617, p= 0,432    | F(1, 1461)= 2,108, p= 0,147    | F(1, 1461)= 2,067, p= 0,151     | F(1, 1461)= 0,506, p= 0,477  |
| Chronic pulmonary | F(1, 1458)= 0,3,519, p= 0,609  | F(1, 1458)= 0,702, p= 0,402    | F(1, 1458)= 0,57, p= 0,45      | F(1, 1458)= 0,655, p= 0,419     | F(1, 1458)= 2.697, p= 0,101  |
| Diabete           | F(1,1444) = 5, 742, p= 0,0167  | F(1, 1444)= 0,006, p= 0,941    | F(1, 1444)= 1, 606, p= 0,205   | F(1, 1444)= 0,005, p= 0,944     | F(1, 1444)= 0,053, p= 0,817  |
| Age Category      | F(5, 1455)= 10,4, p= 7.99e-10  | F(5, 1455)= 7,689, p= 3,8e-07  | F(5, 1455)= 6,608, p= 4,31e-06 | F(5, 1410)= 6,123, p= 1.27e-05  | F(5, 1455)= 1,332, p=0,248   |
| BMI Category      | F(3,1472)=3,315, p= 0,0193     | F(3, 1472)= 3,215, p= 0,0221   | F(3, 1472)= 3,315, p= 0,0193   | F(3, 1472)= 1,352, p= 0,256     | F(3, 1472)= 1,345, p= 0,258  |
| Sex               | F(1, 1472)= 91,61, p= <2e-16   | F(1, 1472)= 84,9, p= <2e-16    | F(1, 1472)= 43,63, p= 5,53e-11 | F(1, 1472)= 25, 16, p= 5,91e-07 | F(1, 1472)= 4,858, p= 0,0277 |
| Autoimmune        | F(1, 1436)= 20,83, p= 5,45e-06 | F(1, 1436)= 11,33, p= 0,000784 | F(1, 1436)= 4, 354, p= 0,0371  | F(1, 1436)= 0,419, p= 0,517     | F(1, 1436)= 2,137, p= 0,144  |
| Cancer            | F(1, 1461)=0,927, p= 0,336     | F(1, 1461)= 2,48, p= 0,115     | F(1, 1461)= 0,295, p= 0,587    | F(1, 1461)= 3,525, p= 0,0607    | F(1, 1461)= 0,298, p= 0,585  |
| Hematologic       | F(1, 1466)=1,113, p= 0,292     | F(1, 1466)= 0,311, p= 0,577    | F(1, 1466)= 0,037, p= 0,848    | F(1, 1466)= 0,559, p= 0,455     | F(1, 1466)= 1,765, p= 0,184  |
| HIV               | F(1,1464)=0,137, p= 0,712      | F(1, 1464)= 0,02, p= 0,887     | F(1,1464)= 7,953, p= 0,00487   | F(1, 1464)= 3,278, p= 0,0704    | F(1, 1464)= 0,272, p= 0,602  |
| Malnourished      | F(1, 1463)= 15,79, p= 7.43e-05 | F(1, 1463)= 21,14, p= 4,63e-06 | F(1, 1463)= 14,35, p= 0,000158 | F(1, 1463)= 8,825, p= 0,00302   | F(1, 1463)= 2,112, p= 0,146  |
| Organ transplant  | F(1,1474)= 0,02, p= 0,886      | F(1, 1474)= 0,05, p= 0,823     | F(1, 1474)= 0,126, p= 0,722    | F(1, 1474)= 2,98, p= 0,0845     | F(1, 1474)= 0,337, p= 0,562  |
| Rheumatic         | F(1, 1400)= 15,22, p= 1e-04    | F(1, 1400)= 6,748, p= 0,00949  | F(1, 1400)= 2,796, p= 0,0947   | F(1, 1400)= 0,037, p=0,847      | F(1, 1400)= 0,231, p= 0,631  |
| Alcohol           | F(1, 1473)= 3,69, p= 0,0549    | F(1, 1473)= 0,162, p= 0,687    | F(1, 1473)= 0,927, p= 0,336    | F(1, 1473) = 2,863, p= 0,0908   | F(1, 1473)= 5,949, p= 0,0148 |
| Smoking           | F(3, 1472)= 2,461, p= 0,0611   | F(3, 1472)= 2,749, p= 0,0416   | F(3, 1472)= 1,481, p= 0,218    | F(3, 1472)= 3,788, p= 0,0101    | F(3, 1472)= 1,209, p= 0,305  |
| Cardiac           | F(1, 1429)= 0,53, p= 0,467     | F(1, 1429)= 0,017, p= 0,897    | F(1, 1429)=0,165, p= 0,684     | F(1, 1429)= 0,3, p= 0,584       | F(1, 1429)= 0,006, p= 0,938  |

|             |                                   |                                   |                                   |                                   |                                   |
|-------------|-----------------------------------|-----------------------------------|-----------------------------------|-----------------------------------|-----------------------------------|
| CTQ 2       | F(1, 1420)= 35,99,<br>p= 2,51e-09 | F(1, 1420)= 24,95,<br>p= 6,61e-07 | F(1, 1420)= 17,58,<br>p= 2,93e-05 | F(1, 1420)= 17,59,<br>p= 2,9e-05  | F(1, 1420)= 1,401,<br>p= 0,237    |
| Psychiatric | F(1, 1453)= 108,9,<br>p= <2e-16   | F(1, 1453)= 95,56,<br>p= <2e-16   | F(1, 1453)= 15,24,<br>p= 9,88e-05 | F(1,1453)= 52,85,<br>p= 5,85e-13  | F(1, 1453)= 43,23,<br>p= 6.78e-11 |
| ATE         | F(2, 1473)= 23,59,<br>p= 9,77e-12 | F(2, 1473)= 25,57,<br>p=1,21e-11  | F(2, 1473)= 6,081,<br>p= 0,00234  | F(2, 1473)= 11,15,<br>p= 1,56e-05 | F(2, 1473)= 5,15,<br>p= 0,00591   |
| BRS         | F(1, 1474)= 72,69,<br>P<2e-16     | F(1, 1474)= 67,77,<br>P= 4e-16    | F(1, 1474)= 14, 3,<br>P= 1,6e-4   | F(1, 1474)= 28,23,<br>P= 1,24e-7  | N/A                               |

**Supplementary table 3: univariate analyses of the baseline for psychological scales.** All statistics, at the beginning of the study, for each psychological questionnaire associated to comorbidities are given in the table.

Supplementary Table 4

| Comorbidities     | CES                             | GAD                             | UCLA                           | PSS                              |
|-------------------|---------------------------------|---------------------------------|--------------------------------|----------------------------------|
| Mild liver        | F(1, 1439)= 0,298,<br>p= 0,585  | F(1, 1439)= 0,047,<br>p= 0,828  | F(1, 1439)= 0,001,<br>p= 0,98  | F(1, 1439)= 0,008,<br>p= 0,929   |
| Hypertension      | F(1, 1454)= 0,147,<br>p= 0,701  | F(1, 1454)= 0,136,<br>p= 0,713  | F(1, 1454)= 0,237,<br>p= 0,626 | F(1, 1454)= 1,667,<br>p= 0,197   |
| Chronic kidney    | F(1, 1461)= 0,731,<br>p= 0,393  | F(1, 1461)= 1,649,<br>p= 0,199  | F(1, 1461)= 1,032,<br>p= 0,31  | F(1, 1461)= 2,94,<br>p= 0,0866   |
| Chronic pulmonary | F(1, 1458)= 0,224,<br>p= 0,637  | F(1, 1458)= 0,329,<br>p= 0,566  | F(1, 1458)= 0,031,<br>p= 0,859 | F(1, 1458)= 0,422,<br>p= 0,512   |
| Diabete           | F(1, 1444)= 3,615,<br>p= 0,0574 | F(1, 1444)= 0,004,<br>p= 0,951  | F(1, 1444)= 0,145,<br>p= 0,703 | F(1, 1444)= 0,224,<br>p= 0,636   |
| Age Category      | F(5, 1455)= 2,037,<br>p= 0,0708 | F(5, 1455)= 2,042,<br>p= 0,0701 | F(5, 1455)= 0,423,<br>p= 0,833 | F(5, 1455)= 2,374,<br>p= 0,0371  |
| BMI Category      | F(3, 1472)= 0,412,<br>p= 0,744  | F(3, 1472)= 0,029,<br>p= 0,993  | F(3, 1472)= 0,698,<br>p= 0,553 | F(3, 1472)= 1,16,<br>p= 0,324    |
| Sex               | F(1, 1472)= 3,485,<br>p= 0,0621 | F(1, 1472)= 7,169,<br>p= 0,0075 | F(1, 1472)= 0,042,<br>p= 0,838 | F(1, 1472)= 0,794,<br>p= 0,373   |
| Autoimmune        | F(1, 1436)= 0,134,<br>p= 0,715  | F(1, 1436)= 0,012,<br>p= 0,911  | F(1, 1436)= 0,337,<br>p= 0,562 | F(1, 1436)= 9,072,<br>p= 0,00264 |
| Cancer            | F(1, 1461)= 0,305,<br>p= 0,581  | F(1, 1461)= 0,339,<br>p= 0,561  | F(1, 1461)= 0,174,<br>0,676    | F(1, 1461)= 0,176,<br>p= 0,675   |
| Hematologic       | F(1, 1466)= 0,021,<br>p= 0,886  | F(1, 1466)= 0,021,<br>p= 0,885  | F(1, 1466)= 0,234,<br>p= 0,629 | F(1, 1466)= 0,057,<br>p= 0,811   |
| HIV               | F(1, 1464)= 0,036,<br>p= 0,85   | F(1, 1464)= 0,02,<br>p= 0,887   | F(1, 1464)= 0,834,<br>p= 0,361 | F(1, 1464)= 0,68,<br>p= 0,41     |
| Malnourished      | F(1, 1463)= 1,534,<br>p= 0,216  | F(1, 1463)= 0,816,<br>p= 0,366  | F(1, 1463)= 0,002,<br>p= 0,966 | F(1, 1463)= 0,127,<br>p= 0,722   |
| Organ transplant  | F(1, 1474)= 2,868,<br>p= 0,0906 | F(1, 1474)= 2,662,<br>p= 0,103  | F(1, 1474)= 1,988,<br>p= 0,159 | F(1, 1474)= 0,497,<br>p= 0,481   |
| Rheumatic         | F(1, 1400)= 3,247,<br>p= 0,0718 | F(1, 1400)= 3,226,<br>p= 0,0727 | F(1, 1400)= 1,298,<br>p= 0,255 | F(1, 1400)= 3,856,<br>p= 0,0498  |
| Alcohol           | F(1, 1473)= 0,049,<br>p= 0,826  | F(1, 1473)= 0,533,<br>p= 0,465  | F(1, 1473)= 1,452,<br>p= 0,228 | F(1, 1473)= 0,04,<br>p= 0,841    |
| Smoking           | F(3, 1472)= 1,999,<br>p= 0,112  | F(3, 1472)= 0,476,<br>p= 0,699  | F(3, 1472)= 0,346,<br>p= 0,792 | F(3, 1472)= 0,1, p=<br>0,96      |
| Cardiac           | F(1, 1429)= 0,021,<br>p= 0,886  | F(1, 1429)= 0,047,<br>p= 0,828  | F(1, 1429)= 0,311,<br>p= 0,577 | F(1, 1429)= 0,73,<br>p= 0,393    |
| CTQ 2             | F(1, 1420)= 5,28,<br>p= 0,0217  | F(1, 1420)= 6,147,<br>p= 0,0133 | F(1, 1420)= 3,849,<br>p= 0,05  | F(1, 1420)= 4,77,<br>p= 0,0291   |

|             |                                 |                                  |                                 |                                  |
|-------------|---------------------------------|----------------------------------|---------------------------------|----------------------------------|
| Psychiatric | F(1, 1473)= 0,167,<br>p= 0,683  | F(1, 1453)= 1,122,<br>p= 0,29    | F(1, 1453)= 0,17,<br>p= 0,68    | F(1, 1453)= 0,338,<br>p= 0,561   |
| ATE         | F(2, 1473)= 3,307,<br>p= 0,0369 | F(2, 1473)= 5,262,<br>p= 0,00528 | F(2, 1473)= 1,219,<br>p= 0,296  | F(2, 1474)= 3,391,<br>p= 0,0339  |
| BRS         | F(1, 1474)= 0,423,<br>P= 0,525  | F(1, 1474)= 0,478,<br>P= 0,486   | F(1, 1474)= 2,898,<br>P= 0,0889 | F(1, 1474)= 28,23,<br>P= 3,25e-3 |

**Supplementary table 4: univariate analyses of the delta between V0 and V4 for psychological scales**

All statistics, between the beginning and the end of the study, for each psychological questionnaire associated to comorbidities are given in the table.
